# Supplementary material for: Nociceptor activity induces nonionotropic NMDA receptor signaling to enable spinal reconsolidation and reverse pathological pain
Source: PubMed Central journal article supplement (PMC10198626; doi:10.1126/sciadv.adg2819), 2023-05-19
Supplement: sciadv.adg2819_sm.pdf [file sciadv.adg2819_sm.pdf]

Supplementary Materials for  
**Nociceptor activity induces nonionotropic NMDA receptor signaling to enable  
spinal reconsolidation and reverse pathological pain**

Hantao Zhang *et al.*

Corresponding author: Robert P. Bonin, [rob.bonin@utoronto.ca](mailto:rob.bonin@utoronto.ca)

*Sci. Adv.* **9**, eadg2819 (2023)  
DOI: 10.1126/sciadv.adg2819

**This PDF file includes:**

Figs. S1 to S8  
Tables S1 and S2

Figure S1

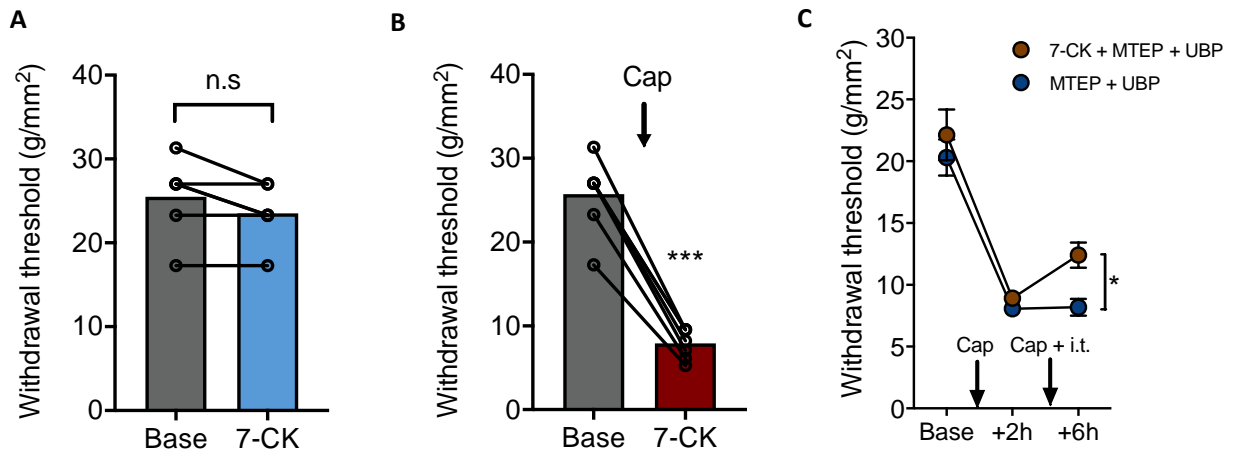

**Figure S1. NI-NMDAR activity does not affect baseline mechanical sensitivity, it does not suppress pain processing in naïve C57BL/6N mice, and it is independent of GluK1 and mGluR5 receptors.** Changes in mechanical withdrawal thresholds after: (A) intrathecal injection of 7-CK, (B) intrathecal injection of 7-CK followed by intraplantar capsaicin injection, or (C) intrathecal injection of MTEP hydrochloride (MTEP, mGluR5 receptor antagonist) + UBP-310 (UBP, GluK1 receptor antagonist) ± 7-CK at the time of re-sensitization. Data are mean ± SEM. n.s.  $p > 0.05$ ; \* $p < 0.05$ ; \*\*\* $p < 0.001$ .

Figure S2

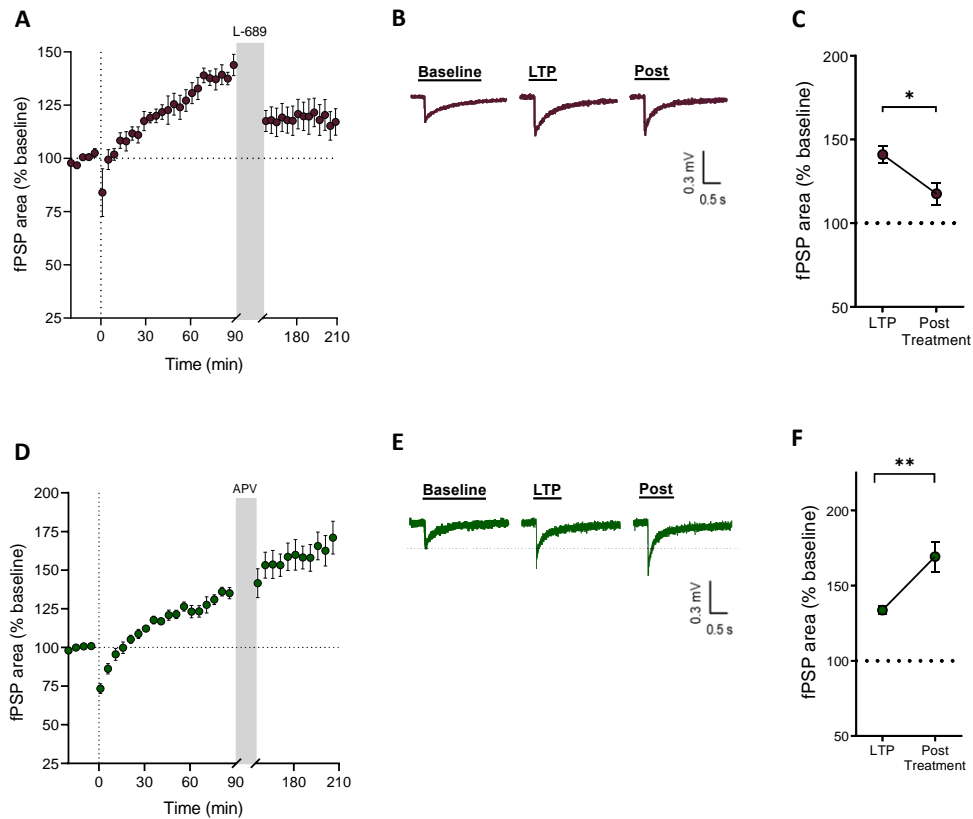

**Figure S2. A different NMDAR glycine site antagonist also reverses dorsal horn LTP, while glutamate site antagonist is unable to decrease LTP magnitude.**

(A) After LTP induction, bath application of glycine site antagonist (L-689,560) from 90min to 150min, was coupled with electrical stimulation of dorsal roots. (B) Representative traces of fPSPs recorded at baseline, 90min (LTP) and 210min (Post). (C) fPSPs area compared before (LTP) and after (Post Treatment) L-689,560 administration. (D) Bath application of NMDAR glutamate site antagonist (APV) during reactivation of sensitized pathways does not reverse dorsal horn LTP. (E) Representative traces of fPSPs recorded at baseline, 90min (LTP) and 210min (Post). (F) fPSPs area compared before (LTP) and after (Post Treatment) APV administration. Data are mean  $\pm$  SEM. \* $p < 0.05$ ; \*\* $p < 0.01$ .

Figure S3

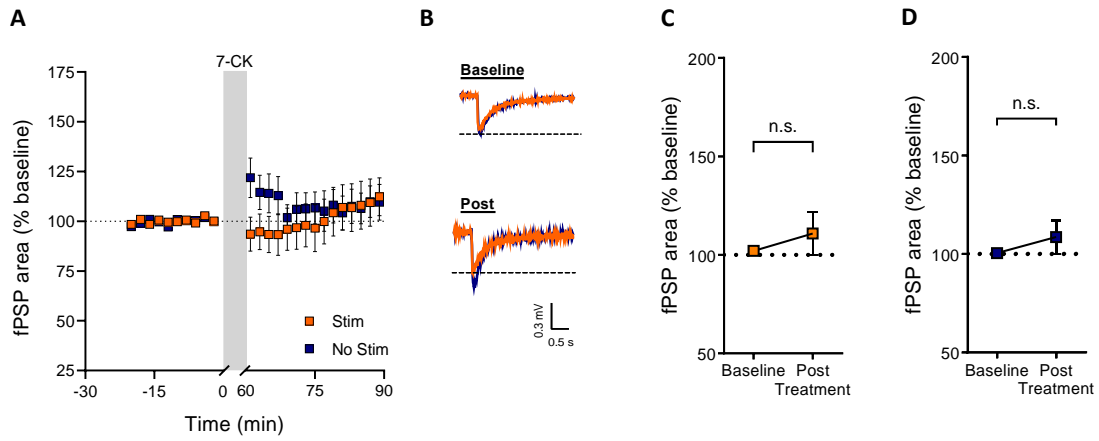

**Figure S3. NI-NMDAR activity does not affect dorsal horn excitability without prior induction of LTP.**

(A) After a stable baseline, 7-CK was bath applied from 0 min to 60 min, without prior induction of LTP. Dorsal roots were electrically stimulated (Orange; Stim) or left unstimulated (Blue; No Stim) during 7-CK administration. (B) Representative traces of fPSPs recorded at baseline and 90 min (Post). (C, D) fPSPs area compared before (Baseline) and after (Post Treatment) 7-CK administration (C) with stimulation or (D) without stimulation. Data are mean  $\pm$  SEM. n.s. indicates  $p > 0.05$ .

Figure S4

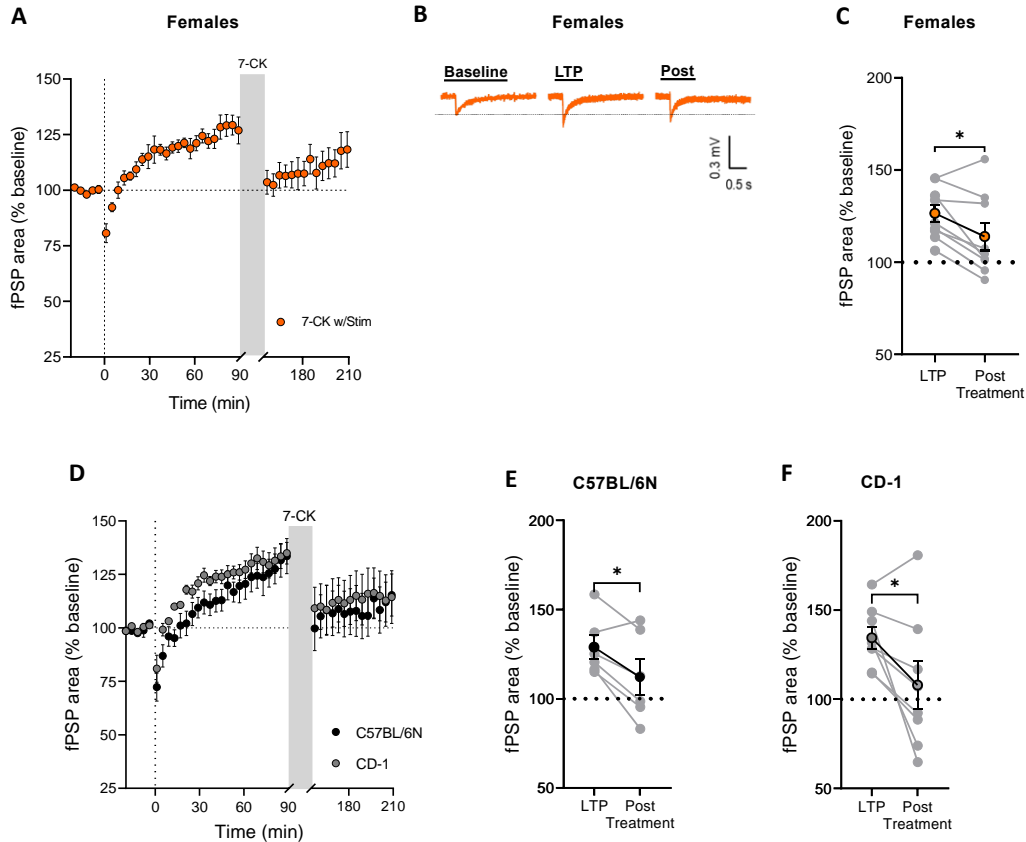

**Figure S4. NI-NMDAR activity can reverse dorsal horn LTP in both sexes, and across two common strains of laboratory mice.**

In female C57BL/6N mice: (A) LTP of fPSPs in the SDH was induced via 2Hz stimulation of dorsal roots followed by bath application of 7-CK from 90min to 150mins with electrical stimulation of sensitized pathways. (B) Representative traces of fPSPs recorded at baseline, 90min (LTP) and 210min (Post). (C) fPSPs area compared before (LTP) and after (Post Treatment) 7-CK application with stimulation of dorsal roots. (D) NI-NMDAR activity reversed dorsal horn LTP in C57BL/6N mice (Black) and CD-1 mice (Grey). (E, F) Comparison of fPSPs area before (LTP) and after (Post Treatment) 7-CK administration with stimulation in (E) C57BL/6N mice, or (F) CD-1 mice. Data are mean  $\pm$  SEM. \* $p < 0.05$ .

Figure S5

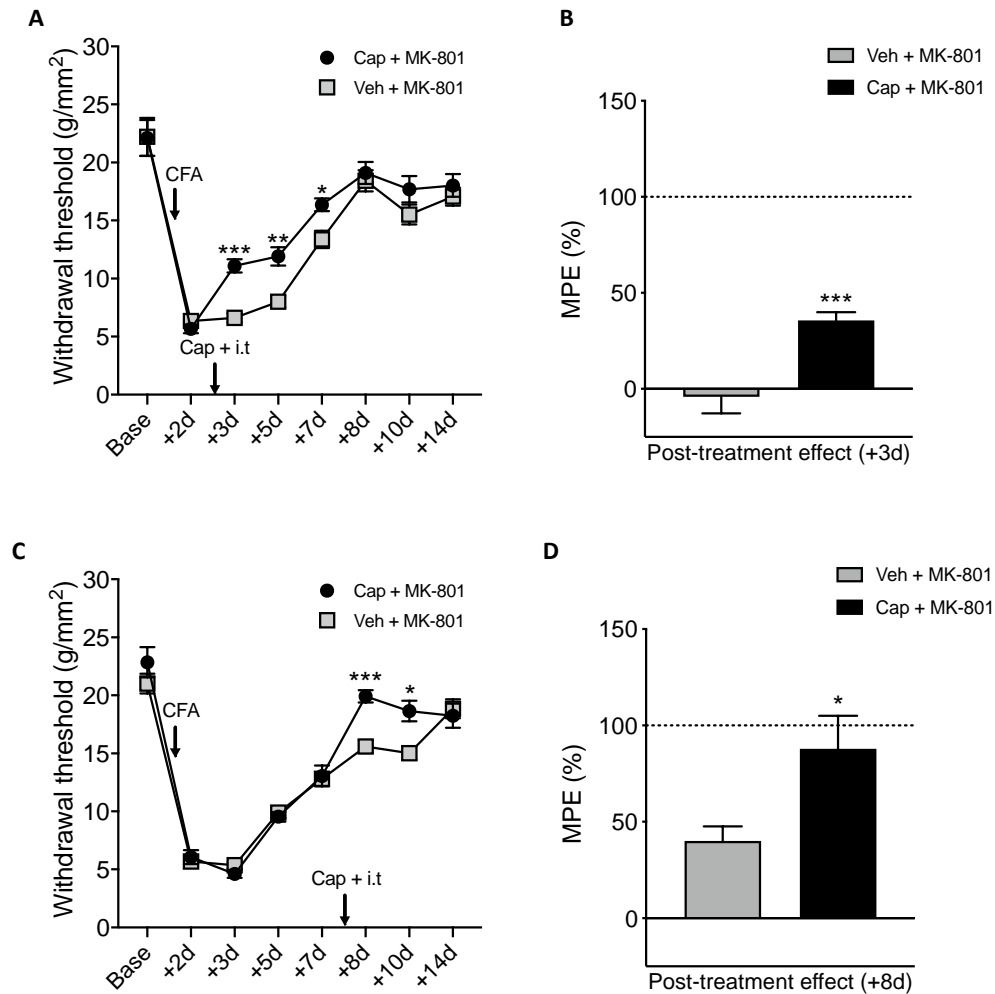

**Figure S5. NI-NMDAR activity produces long-lasting analgesic effects and reduces recovery time from CFA-induced hyperalgesia.**

(A) Changes in mechanical withdrawal thresholds induced by intraplantar Complete Freund's Adjuvant (CFA) followed by a second ipsilateral intraplantar injection of capsaicin (Cap) or vehicle (Veh) and i.t. injection of MK-801 on day 2 ( $n = 12$  mice per group). (B) Summary of antihyperalgesia effect in (A) on day 3 (i.e.: 24 hours after treatment) expressed as percentage of Maximum Possible Effect (MPE). (C) Changes in mechanical withdrawal thresholds induced by intraplantar Complete Freund's Adjuvant (CFA) followed by a second ipsilateral intraplantar injection of capsaicin (Cap) or vehicle (Veh) and i.t. injection of MK-801 on day 7 ( $n = 12$  mice per group). (D) Summary of antihyperalgesia effect in (C) on day 8 (i.e.: 24 hours after treatment) expressed as percentage of Maximum Possible Effect (MPE). The approximate time of the injections in (A) and (C) are indicated by arrows. All data are presented as mean  $\pm$  SEM. \* $p < 0.05$ ; \*\* $p < 0.01$ ; \*\*\* $p < 0.001$ .

Figure S6

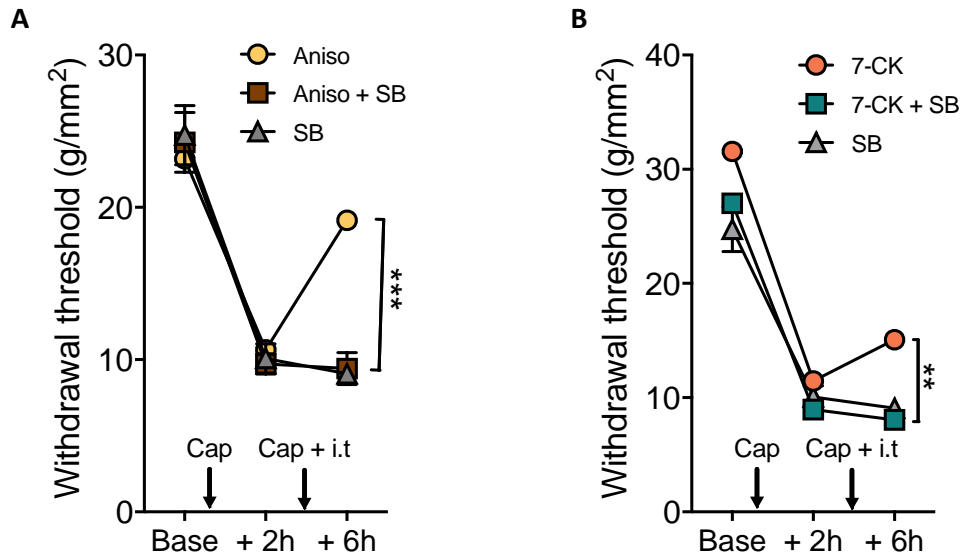

**Figure S6. Both reactive destabilization and NI-NMDAR signaling are dependent on p38 MAPK activation.**

Changes in mechanical withdrawal thresholds induced by intraplantar injection of capsaicin (Cap) followed by a second ipsilateral intraplantar injection of capsaicin (Cap) and intrathecal injection (i.t.) of: (A) anisomycin (Aniso) ± SB-203580 (SB, p38 MAPK inhibitor), or (B) 7-CK ± SB. Controls with i.t. SB alone shown in both (A) and (B). Data are mean ± SEM. \*\*p < 0.01; \*\*\*p < 0.001.

**Figure S7**

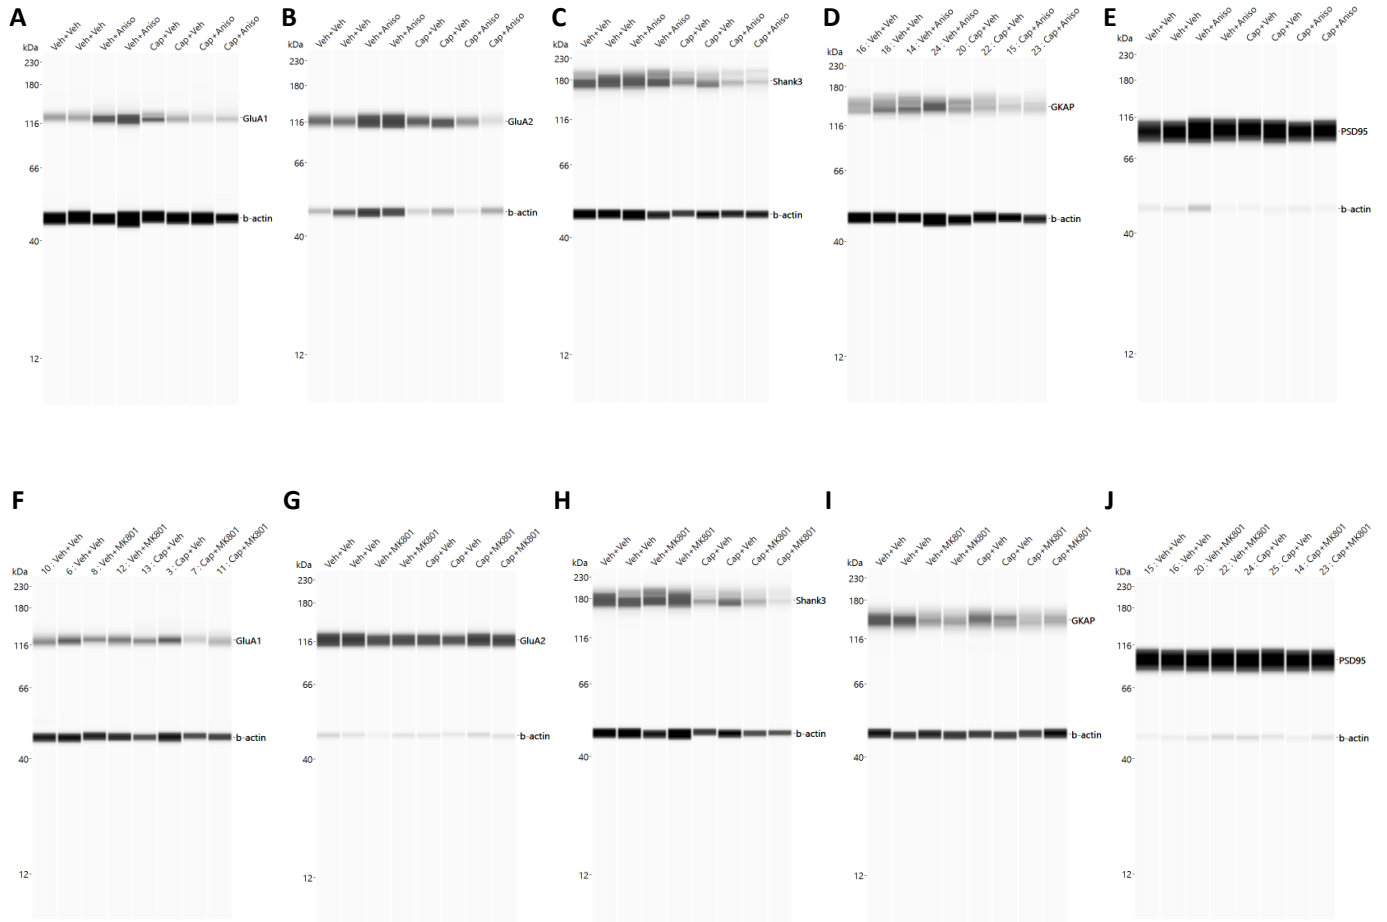

**Figure S7. Full-length Western blot images.**

Full-length Western blot image for (A) Figure 4A; (B) Figure 4B; (C) Figure 4C; (D) Figure 4D; (E) Figure 4E; (F) Figure 4F; (G) Figure 4G; (H) Figure 4H; (I) Figure 4I; (J) Figure 4J.



**Figure S8**

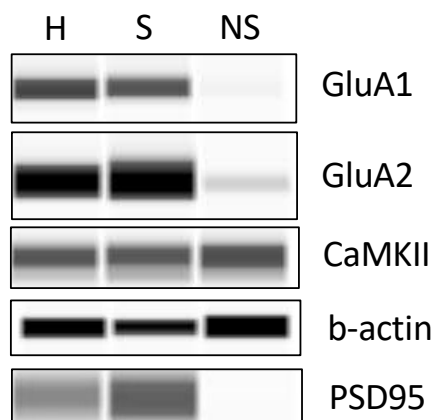

**Figure S8. Representative western blot of total homogenate and subcellular fraction protein from mouse spinal cord.**

Synaptic protein expression in different spinal dorsal horn protein fractions; H = homogenized tissue, S = synaptosome fraction, NS = non-synaptic fraction. Western blot analysis of crude synaptosome preparation showed that synaptic markers were strongly maintained in crude synaptosome fraction. Immunoblots of total homogenate (H), crude synaptosome (S), and cytosol non-synaptic fraction (NS) were probed for GluA1 (postsynaptic membrane), GluA2 (postsynaptic membrane), CaMKII (synaptic), b-actin (structural, loading control), and PSD95 (postsynaptic density).

**Table S1. Key reagents/resources table**

| REAGENT or RESOURCE                                                     | SOURCE                    | IDENTIFIER       |
|-------------------------------------------------------------------------|---------------------------|------------------|
| Antibodies                                                              |                           |                  |
| Rabbit Monoclonal anti-GluA1                                            | Abcam                     | Cat# ab109450    |
| Rabbit Monoclonal anti-GluA2                                            | Abcam                     | Cat# ab206293    |
| Rabbit Polyclonal anti-GKAP                                             | Cell signaling technology | Cat# CST 13602   |
| Rabbit Monoclonal anti-Shank3                                           | Cell signaling technology | Cat# CST 64555   |
| Rabbit Monoclonal anti-PSD95                                            | Cell signaling technology | Cat# CST 3450    |
| Rabbit Monoclonal anti- $\beta$ - actin                                 | Cell signaling technology | Cat# CST 4970    |
| Chemicals, and peptides                                                 |                           |                  |
| Anisomycin                                                              | Cayman Chemical           | Cat# 11308       |
| 7-Chlorokynurenic acid (7-CK)                                           | Abcam                     | Cat# ab120024    |
| APV                                                                     | Millipore-Sigma Canada    | Cat# A8054       |
| NMDA                                                                    | Millipore-Sigma Canada    | Cat# M3262       |
| Capsaicin                                                               | Millipore-Sigma Canada    | Cat# M2028       |
| L-689,560                                                               | Alomone Labs              | Cat# L225        |
| AV-101                                                                  | Vistagen                  | N/A              |
| Complete Freund's Adjuvant                                              | Millipore-Sigma Canada    | Cat# F5881       |
| (+)-MK-801 maleate                                                      | Tocris Biotechne          | Cat# 0924        |
| Tautomycetin                                                            | Tocris Biotechne          | Cat# 2305        |
| PYR-41                                                                  | Tocris Biotechne          | Cat# 2978        |
| Lactacystin                                                             | Tocris Biotechne          | Cat# 2267        |
| MTEP hydrochloride                                                      | Tocris Biotechne          | Cat# 2921        |
| UBP-310                                                                 | Tocris Biotechne          | Cat# 3621        |
| SB-203580                                                               | Tocris Biotechne          | Cat# 1202        |
| TAT-NMDAR <sub>C1.1</sub> [864-877]:<br>(YGRKKRRQRRRDRKSGRAEPDP<br>KKK) | GenScript                 | Custom Synthesis |
| TAT-NMDAR <sub>C1.2</sub> [877-900]:                                    | GenScript                 | Custom Synthesis |

|                                                                         |                            |                                                                                                                                                       |
|-------------------------------------------------------------------------|----------------------------|-------------------------------------------------------------------------------------------------------------------------------------------------------|
| (YGRKKRRQRRRKATFRAITSTLAS)<br>S)                                        |                            |                                                                                                                                                       |
| TAT-NMDAR <sub>Scrambled C1.1:</sub><br>(YGRKKRRQRRREPAKDDGRRKP<br>SKK) | GenScript                  | Custom Synthesis                                                                                                                                      |
| TAT-NMDAR <sub>Scrambled C1.2:</sub><br>(YGRKKRRQRRRAATRSTFASKTLI<br>S) | GenScript                  | Custom Synthesis                                                                                                                                      |
| Experimental Models: Organisms/Strain                                   |                            |                                                                                                                                                       |
| C57BL/6N                                                                | Charles River Laboratories | N/A                                                                                                                                                   |
| CD-1                                                                    | Charles River laboratories | N/A                                                                                                                                                   |
| Software and algorithm                                                  |                            |                                                                                                                                                       |
| Axon pCLAMP 10                                                          | Molecular Devices          | <a href="https://mdc.custhelp.com/euf/assets/content/pCLAMP10_User_Guide.pdf">https://mdc.custhelp.com/euf/assets/content/pCLAMP10_User_Guide.pdf</a> |
| Graphpad Prism 8                                                        | Graphpad                   | <a href="https://www.graphpad.com/">https://www.graphpad.com/</a>                                                                                     |

**Table S2. Statistics Table**

|               | Test Used      |         | n           |         | Descriptive Stats<br>(Average, variance) | P Value     | Degree of freedom & F/t/z/R/ETC Value |
|---------------|----------------|---------|-------------|---------|------------------------------------------|-------------|---------------------------------------|
| Figure Number | Test           | Section | Exact value | Defined | Reported                                 | Exact Value | Exact Value                           |
| 1B            | 2-way RM-ANOVA | Fig 1   | 10,10,10    | mice    | mean ± SEM                               | P < 0.001   | F(4,54) = 9.6                         |
| 1C            | 2-way RM-ANOVA | Fig 1   | 10,10,10    | mice    | mean ± SEM                               | P < 0.001   | F(4,54) = 16.7                        |
| 1D            | 2-way RM-ANOVA | Fig 1   | 6,6,12      | mice    | mean ± SEM                               | P < 0.001   | F(2,21) = 14.0                        |
| 1E            | 2-way RM-ANOVA | Fig 1   | 6,6,6       | mice    | mean ± SEM                               | p = 0.014   | F(2,15) = 5.7                         |
| 1F            | 2-way RM-ANOVA | Fig 1   | 7,7         | mice    | mean ± SEM                               | p = 0.011   | F(2,24) = 5.4                         |
| 1G            | 2-way RM-ANOVA | Fig 1   | 8,7         | mice    | mean ± SEM                               | p < 0.001   | F(1,13) = 20.7                        |
| 1H            | 2-way RM-ANOVA | Fig 1   | 4,4         | mice    | mean ± SEM                               | p = 0.017   | F(2,12) = 5.8                         |
| 1I            | 1-way ANOVA    | Fig 1   | 4,4,4,4     | mice    | mean ± SEM                               | p = 0.0016  | F(3,12) = 9.7                         |
| 1L            | paired t-test  | Fig 1   | 14,14       | mice    | mean ± SEM                               | p = 0.0038  | t(13) = 3.5                           |
| 1M            | paired t-test  | Fig 1   | 6,6         | mice    | mean ± SEM                               | p = 0.68    | t(5) = 0.40                           |
| 2B            | 2-way RM-ANOVA | Fig 2   | 6,6         | mice    | mean ± SEM                               | p < 0.001   | F(2,20) = 131.1                       |

|    |                |       |              |      |            |            |                  |
|----|----------------|-------|--------------|------|------------|------------|------------------|
| 2C | 2-way RM-ANOVA | Fig 2 | 6,6          | mice | mean ± SEM | p < 0.001  | F(2, 20) = 10.9  |
| 2E | 1-way ANOVA    | Fig 2 | 7,9,9,7,7    | mice | mean ± SEM | p < 0.001  | F(4,34) = 7.2    |
| 2F | 1-way ANOVA    | Fig 2 | 16,10,10,7,7 | mice | mean ± SEM | p < 0.001  | F(4,45) = 7.2    |
| 2G | 2-way RM-ANOVA | Fig 2 | 6,5,5        | mice | mean ± SEM | p = 0.19   | F(2,13) = 1.9    |
| 3A | 2-way RM-ANOVA | Fig 3 | 6,6,6        | mice | mean ± SEM | p < 0.001  | F(2,25) = 11.0   |
| 3D | paired t-test  | Fig 3 | 5,5          | mice | mean ± SEM | p = 0.0035 | t(13) = 3.5      |
| 3E | paired t-test  | Fig 3 | 4,4          | mice | mean ± SEM | p = 0.67   | t(3) = 0.5       |
| 3F | 2-way RM-ANOVA | Fig 3 | 6,6,6        | mice | mean ± SEM | p < 0.001  | F(2,25) = 11.1   |
| 3I | paired t-test  | Fig 3 | 14,14        | mice | mean ± SEM | p = 0.0038 | t(13) = 3.5      |
| 3J | paired t-test  | Fig 3 | 6,6          | mice | mean ± SEM | p = 0.82   | t(5) = 0.2       |
| 4A | 1-way ANOVA    | Fig 4 | 8,8,8,8      | mice | mean ± SEM | p = 0.0090 | F (3,28) = 4.7   |
| 4B | 1-way ANOVA    | Fig 4 | 8,8,8,8      | mice | mean ± SEM | p = 0.0070 | F (3,28) = 4.9   |
| 4C | 1-way ANOVA    | Fig 4 | 7,8,8,8      | mice | mean ± SEM | p < 0.001  | F (3,27) = 12.1  |
| 4D | 1-way ANOVA    | Fig 4 | 8,8,8,8      | mice | mean ± SEM | p < 0.001  | F (3, 28) = 11.3 |
| 4E | 1-way ANOVA    | Fig 4 | 8,8,8,8      | mice | mean ± SEM | p = 0.84   | F (3, 28) = 0.3  |
| 4F | 1-way ANOVA    | Fig 4 | 8,8,8,8      | mice | mean ± SEM | p = 0.021  | F (3,28) = 3.8   |
| 4G | 1-way ANOVA    | Fig 4 | 8,8,8,8      | mice | mean ± SEM | p = 0.89   | F (3,28) = 0.2   |

|     |                |        |         |      |                |            |                 |
|-----|----------------|--------|---------|------|----------------|------------|-----------------|
| 4H  | 1-way ANOVA    | Fig 4  | 7,8,8,8 | mice | mean $\pm$ SEM | p = 0.050  | F (3, 27) = 2.9 |
| 4I  | 1-way ANOVA    | Fig 4  | 8,8,8,8 | mice | mean $\pm$ SEM | p = 0.0060 | F (3,28) = 5.1  |
| 4J  | 1-way ANOVA    | Fig 4  | 8,8,8,8 | mice | mean $\pm$ SEM | p = 0.90   | F (3,28) = 0.2  |
| 4K  | 2-way RM-ANOVA | Fig 4  | 6,6,16  | mice | mean $\pm$ SEM | p = 0.0010 | F(4,50) = 5.3   |
| 4L  | 2-way RM-ANOVA | Fig 4  | 6,14,16 | mice | mean $\pm$ SEM | p = 0.010  | F(4,66) = 3.6   |
| 4M  | 2-way RM-ANOVA | Fig 4  | 9,8     | mice | mean $\pm$ SEM | p = 0.0050 | F(2,30) = 6.2   |
| 4N  | 2-way RM-ANOVA | Fig 4  | 9,7     | mice | mean $\pm$ SEM | p = 0.0020 | F(2,28) = 7.5   |
| S1A | paired t-test  | Fig S1 | 6,6     | mice | mean $\pm$ SEM | p = 0.077  | t(5) = 2.2      |
| S1B | paired t-test  | Fig S1 | 7,7     | mice | mean $\pm$ SEM | p < 0.001  | t(6) = 15.5     |
| S1C | 2-way RM-ANOVA | Fig S1 | 6,6     | mice | mean $\pm$ SEM | p = 0.0090 | F (1,10) = 10.5 |
| S2C | paired t-test  | Fig S2 | 7,7     | mice | mean $\pm$ SEM | p = 0.029  | t(6) = 2.8      |
| S2F | paired t-test  | Fig S2 | 7,7     | mice | mean $\pm$ SEM | p = 0.0069 | t(6)= 4.0       |
| S3C | paired t-test  | Fig S3 | 9,9     | mice | mean $\pm$ SEM | p = 0.39   | t(8) = 0.9      |
| S3D | paired t-test  | Fig S3 | 11,11   | mice | mean $\pm$ SEM | p = 0.34   | t(10) = 1.0     |
| S4C | paired t-test  | Fig S4 | 9,9     | mice | mean $\pm$ SEM | p = 0.015  | t(8) = 3.1      |
| S4E | paired t-test  | Fig S4 | 6,6     | mice | mean $\pm$ SEM | p = 0.028  | t(5) = 3.1      |
| S4F | paired t-test  | Fig S4 | 8,8     | mice | mean $\pm$ SEM | p = 0.039  | t(7) = 2.5      |

|     |                       |        |       |      |                |            |                |
|-----|-----------------------|--------|-------|------|----------------|------------|----------------|
| S5A | 2-way<br>RM-<br>ANOVA | Fig S5 | 12,12 | mice | mean $\pm$ SEM | p = 0.034  | F(7,154) = 2.2 |
| S5B | unpaired<br>t-test    | Fig S5 | 12,12 | mice | mean $\pm$ SEM | p < 0.001  | t(22) = 4.1    |
| S5C | 2-way<br>RM-<br>ANOVA | Fig S5 | 12,12 | mice | mean $\pm$ SEM | p < 0.001  | F(7,154) = 4.2 |
| S5D | unpaired<br>t-test    | Fig S5 | 12,12 | mice | mean $\pm$ SEM | p = 0.018  | t(22) = 2.6    |
| S6A | 2-way<br>RM-<br>ANOVA | Fig S6 | 8,7,6 | mice | mean $\pm$ SEM | P < 0.001  | F(2,30) = 7.4  |
| S6B | 2-way<br>RM-<br>ANOVA | Fig S6 | 8,7,6 | mice | mean $\pm$ SEM | p = 0.0012 | F(2,30) = 5.6  |
